# Supplementary material for: Theoretical and experimental study on the degradation mechanism of atrazine in Fenton oxidation treatment
Source: Royal Society of Chemistry journal article supplement (doi:10.1039/c6ra26918d), 2017-01-01
Supplement: c6ra26918d1.pdf [file c6ra26918d1.pdf]

**Supporting Information for**

**Theoretical and Experimental Study on the Degradation Mechanism of  
Atrazine in Fenton Oxidation Treatment**

Xue Zhao<sup>a</sup>, Chenxi Zhang<sup>b</sup>, Shuguang Wang<sup>c,\*</sup>, Chao Song<sup>c</sup>, Xiangli<sup>d\*</sup>

*a College of Chemistry, Chemical Engineering and Materials Science, Shandong Normal University, Jinan 250014,*

*P. R. China*

*b Department of Resource and Environment, Binzhou University, Binzhou 256600, PR China*

*c School of Environmental Science and Engineering, Shandong University, Jinan 250100, P. R. China*

*d Department of Environmental Science & Engineering, Fudan University, Shanghai 200433, P. R. China*

---

\*Corresponding authors. E-mail: [wsg@sdu.edu.cn](mailto:wsg@sdu.edu.cn); [lixiang@fudan.edu.cn](mailto:lixiang@fudan.edu.cn)

## **Figure Captions**

**Figure S1** The dealkylation and alkyl oxidation process of IM11 in aqueous medium by Fenton oxidation technology

**Figure S2** Optimized geometries for the transition states involved in the dealkylation and alkyl oxidation process. Distances are in angstroms

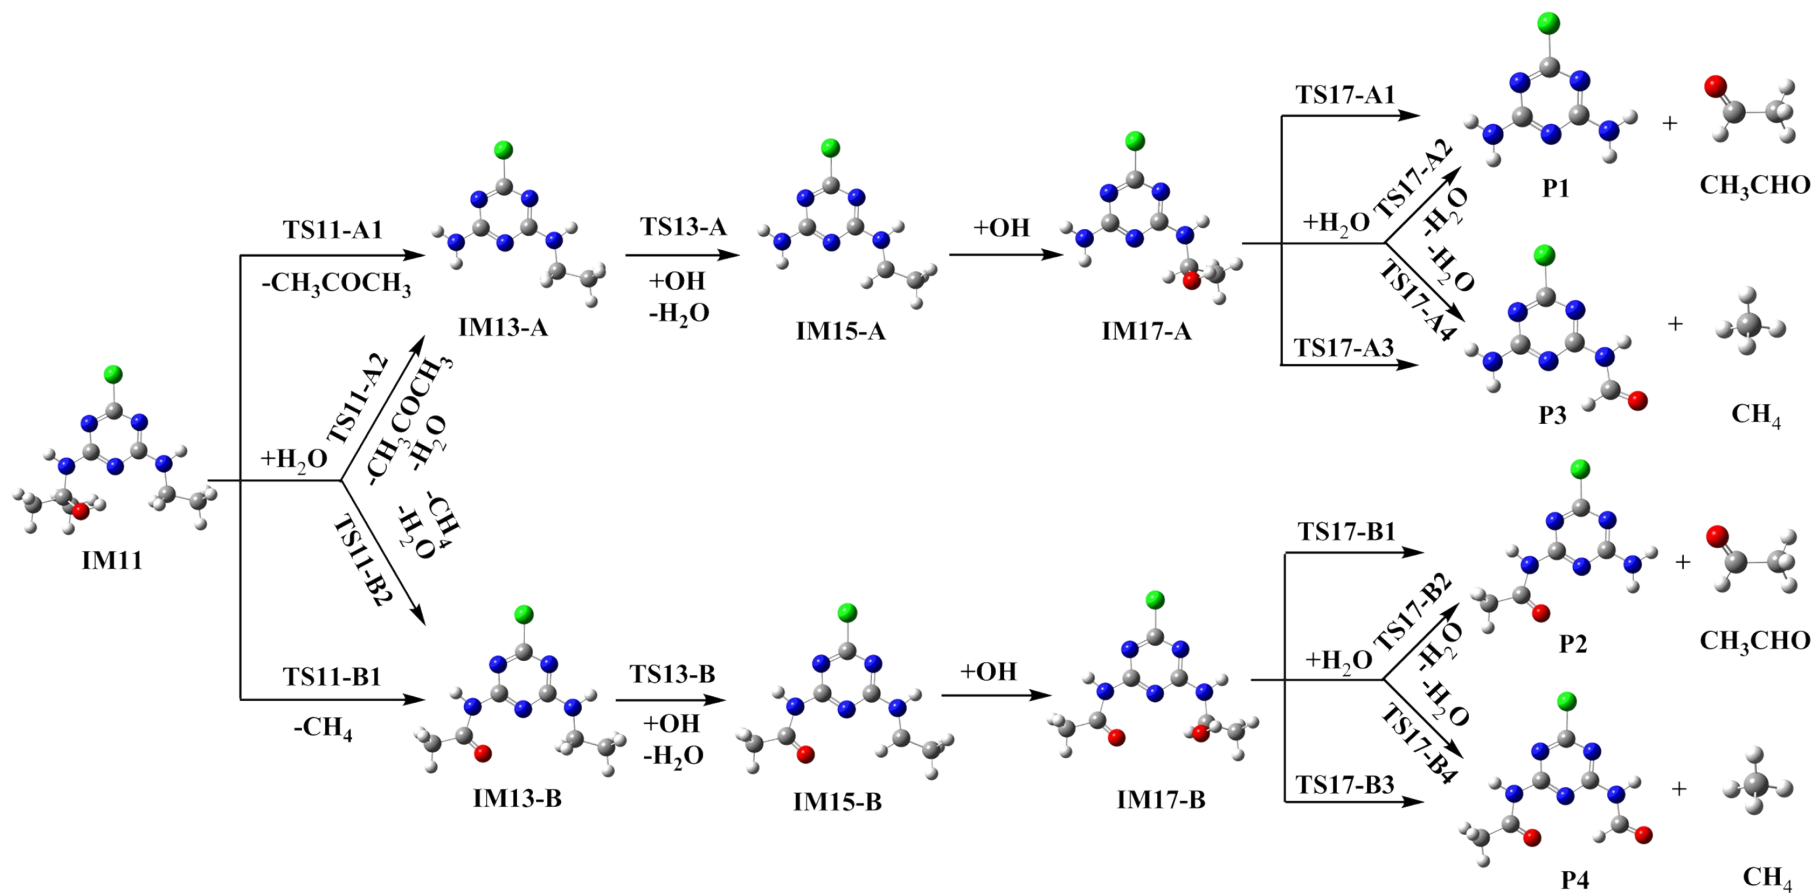

**Figure S1** The dealkylation and alkyl oxidation process of IM11 in aqueous medium by Fenton oxidation technology

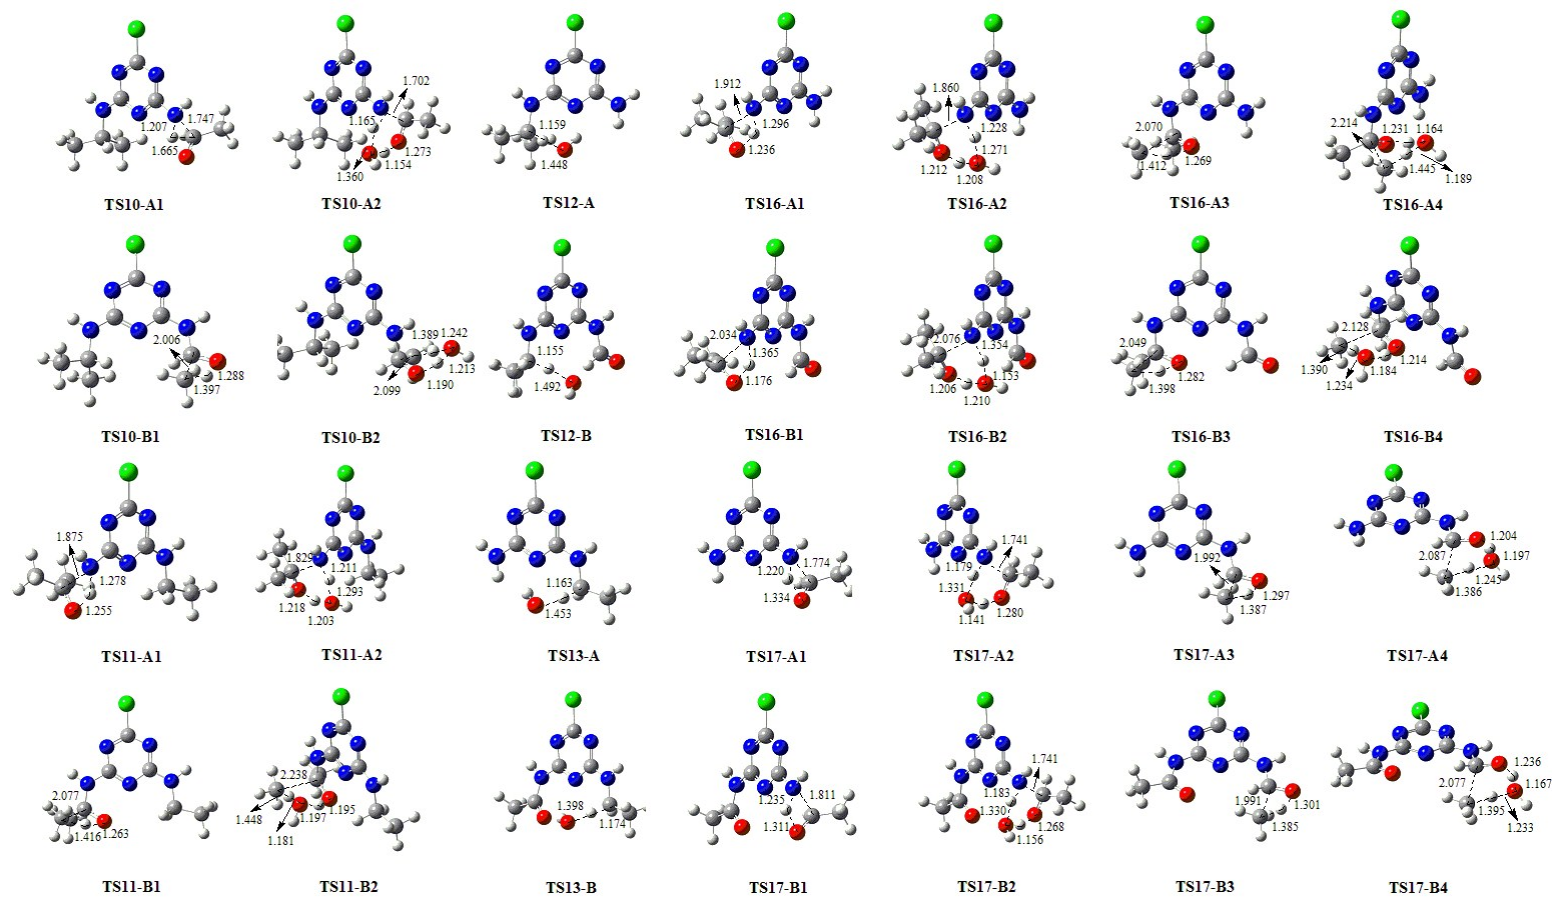

**Figure S2** Optimized geometries for the transition states involved in the dealkylation and alkyl oxidation process. Distances are in angstroms
